# Supplementary material for: Two-compartment tumor metabolism: Autophagy in the tumor microenvironment and oxidative mitochondrial metabolism (OXPHOS) in cancer cells
Source: PubMed Central journal article supplement — Cell Cycle. 2012 Jul 1;11(13):2545–59. doi: 10.4161/cc.20920 (PMC3404881; doi:10.4161/cc.20920), 2012-07-01
Supplement: cc-11-2545-s01.pdf [file cc-11-2545-s01.pdf]

## **Supplemental Material to:**

**Ahmed F. Salem, Diana Whitaker-Menezes, Zhao Lin,  
Herbert B. Tanowitz, Mazhar Salim Al-Zoubi,  
Anthony Howell, Richard G. Pestell, Federica Sotgia  
and Michael P. Lisanti**

**Two-compartment tumor metabolism: Autophagy in the  
tumor microenvironment, and oxidative mitochondrial  
metabolism (OXPHOS) in cancer cells**

**2012; 11(13)**

**<http://dx.doi.org/10.4161/cc.20920>**

**<http://www.landesbioscience.com/journals/cc/article/20920>**

Supplemental Figure 1A

Fibroblasts

---

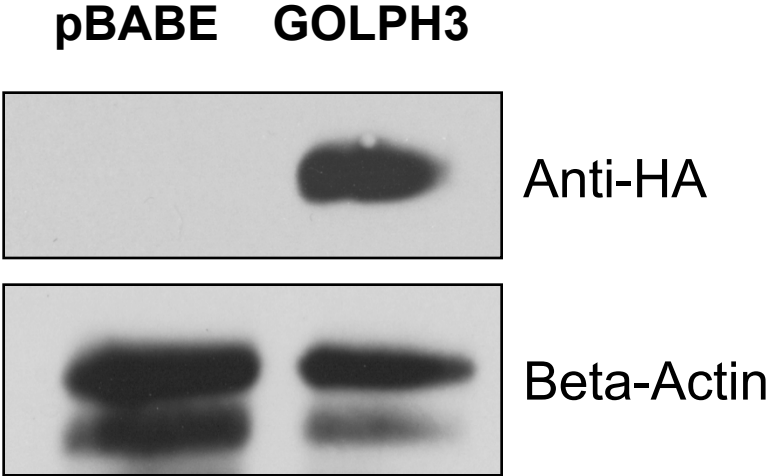

Supplemental Figure 1B

### MitoTracker

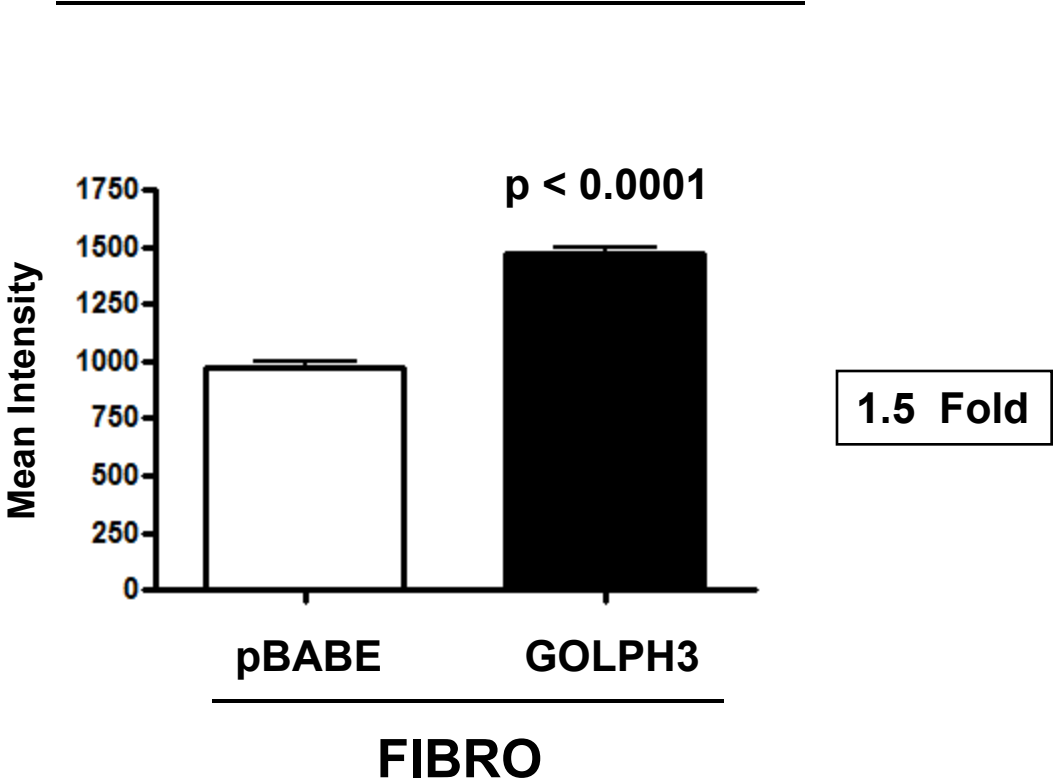

Supplemental Figure 1C

## Tumor Volume

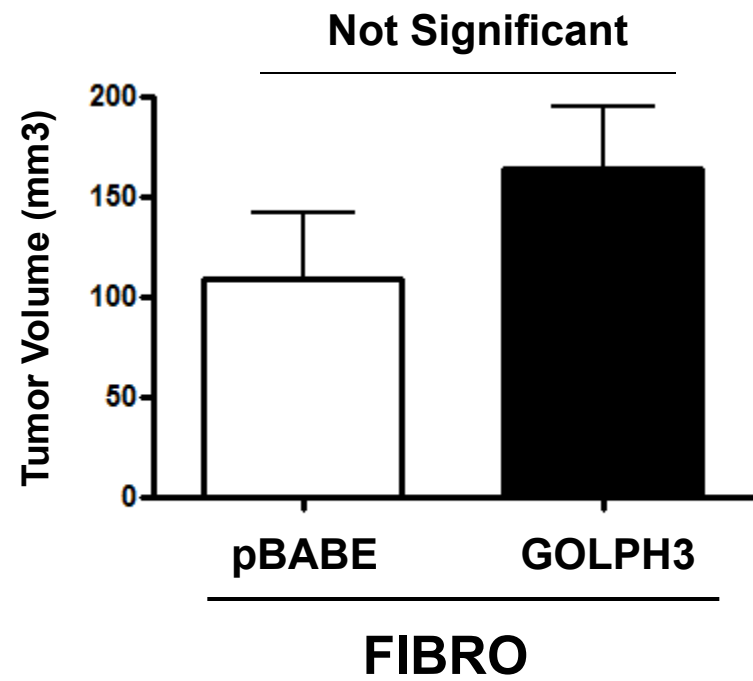

**Supplemental Figure 1. Expression of GOLPH3 in hTERT-immortalized fibroblasts increases mitochondrial function, but does not affect tumor growth.**

**Panel A:** Note that GOLPH3 was successfully stably-expressed in hTERT-BJ1 fibroblasts, as detected using antibodies directed against the HA-epitope tag.

**Panel B:** Over-expression of GOLPH3 in hTERT-fibroblasts increased MitoTracker activity by >1.5-fold,

**Panel C:** Over-expression of GOLPH3 in hTERT-fibroblasts did not significantly affect tumor growth when GOLPH3-fibroblasts were co-injected with MDA-MB-231 breast cancer cells.
